# Supplementary material for: Prevalence of depression and depressive symptoms among outpatients: a systematic review and meta-analysis
Source: PubMed Central journal article supplement — BMJ Open. 2017 Aug 23;7(8):e017173. doi: 10.1136/bmjopen-2017-017173 (PMC5640125; doi:10.1136/bmjopen-2017-017173), 2017-08-23
Supplement: bmjopen-2017-017173supp002.pdf [file bmjopen-2017-017173supp002.pdf]

**Supplementary Table 1. Sensitivity analysis of the 83 Selected Studies**

| First Author, Year                           | Prevalence (%) | Lower<br>95% CI | Upper<br>95% CI | tau <sup>2</sup> | I <sup>2</sup> |
|----------------------------------------------|----------------|-----------------|-----------------|------------------|----------------|
| Omitting Hajduk, A.2016 <sup>66</sup>        | 29.48          | 26.37           | 32.58           | 0.0211           | 98.70%         |
| Omitting Pontone, S.2015 <sup>62</sup>       | 29.68          | 26.57           | 32.80           | 0.0212           | 98.70%         |
| Omitting Xiong, N.2015 <sup>73</sup>         | 29.43          | 26.33           | 32.53           | 0.0210           | 98.70%         |
| Omitting Tedeschini, E.2014 <sup>55</sup>    | 29.36          | 26.26           | 32.47           | 0.0211           | 98.70%         |
| Omitting Zhang, Y.2014 <sup>60</sup>         | 29.78          | 26.66           | 32.91           | 0.0214           | 98.70%         |
| Omitting Bokemeyer, B 2013 <sup>54</sup>     | 29.72          | 26.57           | 32.87           | 0.0217           | 98.70%         |
| Omitting Zhang, Y.2013 <sup>64</sup>         | 29.68          | 26.55           | 32.81           | 0.0214           | 98.70%         |
| Omitting Inagaki, M.2013 <sup>68</sup>       | 29.78          | 26.66           | 32.91           | 0.0214           | 98.70%         |
| Omitting Schaefer, R.2013 <sup>69</sup>      | 29.84          | 26.72           | 32.96           | 0.0213           | 98.70%         |
| Omitting Urrutia, I.2012 <sup>63</sup>       | 29.86          | 26.77           | 32.95           | 0.0208           | 98.60%         |
| Omitting Su, S. F.2012 <sup>72</sup>         | 29.41          | 26.31           | 32.51           | 0.0210           | 98.70%         |
| Omitting Rohani, A 2011 <sup>53</sup>        | 29.52          | 26.41           | 32.63           | 0.0212           | 98.70%         |
| Omitting Pouwer, F.2010 <sup>71</sup>        | 29.49          | 26.38           | 32.60           | 0.0211           | 98.70%         |
| Omitting He, Y. L.2009* <sup>61</sup>        | 29.57          | 26.45           | 32.69           | 0.0213           | 98.70%         |
| Omitting He, Y. L.2009* <sup>61</sup>        | 29.57          | 26.45           | 32.69           | 0.0213           | 98.70%         |
| Omitting Birket-Smith, M.2009# <sup>65</sup> | 29.65          | 26.53           | 32.76           | 0.0212           | 98.70%         |
| Omitting Qin, X.2008 <sup>67</sup>           | 29.47          | 26.37           | 32.57           | 0.0210           | 98.70%         |
| Omitting Addolorato, G.2008 <sup>70</sup>    | 29.58          | 26.44           | 32.71           | 0.0215           | 98.70%         |
| Omitting Noh, J. H.2005 <sup>58</sup>        | 29.51          | 26.39           | 32.62           | 0.0211           | 98.70%         |
| Omitting Janke, K. H.2005 <sup>59</sup>      | 29.77          | 26.64           | 32.90           | 0.0214           | 98.70%         |
| Omitting Yohannes, A. M 2000 <sup>56</sup>   | 29.40          | 26.30           | 32.51           | 0.0211           | 98.70%         |
| Omitting Yohannes, A. M 1998 <sup>57</sup>   | 29.36          | 26.26           | 32.47           | 0.0211           | 98.70%         |
| Omitting Polidoro Lima, M.2014 <sup>75</sup> | 29.68          | 26.53           | 32.84           | 0.0218           | 98.70%         |
| Omitting Alcalar, N.2012 <sup>76</sup>       | 29.52          | 26.41           | 32.63           | 0.0211           | 98.70%         |
| Omitting Jehn, C. F.2012 <sup>77</sup>       | 29.52          | 26.41           | 32.63           | 0.0211           | 98.70%         |
| Omitting Qiu, J.2012 <sup>78</sup>           | 29.67          | 26.54           | 32.80           | 0.0214           | 98.70%         |
| Omitting Reuter, K.2007 <sup>6</sup>         | 29.70          | 26.58           | 32.81           | 0.0212           | 98.70%         |
| Omitting Tsunoda, A 2005 <sup>74</sup>       | 29.46          | 26.35           | 32.57           | 0.0211           | 98.70%         |
| Omitting Hung, C. I.2015 <sup>80</sup>       | 29.63          | 26.51           | 32.75           | 0.0212           | 98.70%         |
| Omitting Weisbord, S. D.2014 <sup>82</sup>   | 29.59          | 26.47           | 32.70           | 0.0212           | 98.70%         |
| Omitting Jung, S.2013 <sup>81</sup>          | 29.48          | 26.37           | 32.59           | 0.0211           | 98.70%         |
| Omitting Diniz, D. H.2007 <sup>79</sup>      | 29.27          | 26.17           | 32.38           | 0.0211           | 98.70%         |
| Omitting Gaillard, A.2014 <sup>84</sup>      | 29.69          | 26.57           | 32.81           | 0.0213           | 98.70%         |
| Omitting He, Y. L.2009* <sup>61</sup>        | 29.67          | 26.54           | 32.80           | 0.0214           | 98.70%         |
| Omitting Wang, W.2008 <sup>87</sup>          | 29.76          | 26.63           | 32.88           | 0.0213           | 98.70%         |
| Omitting Lorencatto, C.2006* <sup>85</sup>   | 28.92          | 25.85           | 31.99           | 0.0206           | 98.70%         |
| Omitting Lorencatto, C.2006* <sup>85</sup>   | 29.46          | 26.35           | 32.56           | 0.0211           | 98.70%         |
| Omitting Poleshuck, E. L.2006 <sup>86</sup>  | 29.63          | 26.51           | 32.75           | 0.0212           | 98.70%         |
| Omitting Wojnar, M.2003 <sup>88</sup>        | 29.68          | 26.50           | 32.86           | 0.0221           | 98.70%         |
| Omitting Bixo, M.2001 <sup>83</sup>          | 29.57          | 26.45           | 32.69           | 0.0213           | 98.70%         |
| Omitting Zdunczyk, B.2014 <sup>90</sup>      | 29.66          | 26.54           | 32.78           | 0.0213           | 98.70%         |

**Supplementary Table 1. Sensitivity analysis of the 83 Selected Studies**

| First Author, Year                            | Prevalence (%) | Lower<br>95% CI | Upper<br>95% CI | tau <sup>2</sup> | I <sup>2</sup> |
|-----------------------------------------------|----------------|-----------------|-----------------|------------------|----------------|
| Omitting Stewart, S. M.2005 <sup>89</sup>     | 29.53          | 26.42           | 32.64           | 0.0212           | 98.70%         |
| Omitting Winter, L. B.1999 <sup>91</sup>      | 29.75          | 26.63           | 32.87           | 0.0212           | 98.70%         |
| Omitting Dickstein, L. P.2015* <sup>94</sup>  | 29.44          | 26.37           | 32.51           | 0.0205           | 98.60%         |
| Omitting Dickstein, L. P.2015* <sup>94</sup>  | 29.38          | 26.38           | 32.38           | 0.0196           | 98.50%         |
| Omitting Worku, D. K.2014 <sup>99</sup>       | 29.24          | 26.14           | 32.33           | 0.0210           | 98.70%         |
| Omitting Mao, C. J.2013* <sup>95</sup>        | 29.24          | 26.15           | 32.34           | 0.0209           | 98.70%         |
| Omitting Mao, C. J.2013* <sup>95</sup>        | 29.30          | 26.19           | 32.40           | 0.0211           | 98.70%         |
| Omitting de Oliveira, G. N.2012 <sup>93</sup> | 29.47          | 26.36           | 32.58           | 0.0211           | 98.70%         |
| Omitting Vogel, A.2011 <sup>97</sup>          | 29.61          | 26.50           | 32.72           | 0.0212           | 98.70%         |
| Omitting Mitsikostas, D. D.2010 <sup>96</sup> | 29.85          | 26.73           | 32.97           | 0.0212           | 98.70%         |
| Omitting He, Y. L.2009* <sup>61</sup>         | 29.53          | 26.41           | 32.64           | 0.0212           | 98.70%         |
| Omitting Carson, A. J.2003 <sup>52</sup>      | 29.42          | 26.31           | 32.52           | 0.0210           | 98.70%         |
| Omitting Williams, L. S.2003 <sup>98</sup>    | 29.49          | 26.38           | 32.60           | 0.0211           | 98.70%         |
| Omitting Carson, A. J.2000 <sup>92</sup>      | 29.49          | 26.38           | 32.60           | 0.0211           | 98.70%         |
| Omitting Balieva, F.2016 <sup>101</sup>       | 29.74          | 26.60           | 32.87           | 0.0215           | 98.70%         |
| Omitting Hon, K. L.2015 <sup>102</sup>        | 29.64          | 26.52           | 32.75           | 0.0212           | 98.70%         |
| Omitting Singh, S. M.2015 <sup>106</sup>      | 29.43          | 26.32           | 32.54           | 0.0211           | 98.70%         |
| Omitting Tsintsadze, N.2015 <sup>107</sup>    | 29.23          | 26.14           | 32.31           | 0.0208           | 98.70%         |
| Omitting Rasouljan, M.2010 <sup>104</sup>     | 29.07          | 26.00           | 32.14           | 0.0206           | 98.70%         |
| Omitting Mattoo, S. K.2001* <sup>103</sup>    | 29.62          | 26.51           | 32.74           | 0.0212           | 98.70%         |
| Omitting Mattoo, S. K.2001* <sup>103</sup>    | 29.54          | 26.43           | 32.65           | 0.0212           | 98.70%         |
| Omitting Roca, R. P.1996 <sup>105</sup>       | 29.18          | 26.09           | 32.28           | 0.0210           | 98.70%         |
| Omitting Attah Johnson, FY1995 <sup>100</sup> | 29.30          | 26.20           | 32.40           | 0.0210           | 98.70%         |
| Omitting Ishikawa, Y.2015 <sup>112</sup>      | 29.83          | 26.81           | 32.84           | 0.0198           | 98.40%         |
| Omitting Rondet, C.2013 <sup>115</sup>        | 29.22          | 26.13           | 32.30           | 0.0207           | 98.70%         |
| Omitting Okumura, T.2010 <sup>114</sup>       | 29.79          | 26.66           | 32.92           | 0.0214           | 98.70%         |
| Omitting Birket-Smith, M.2009 <sup>#65</sup>  | 29.65          | 26.53           | 32.76           | 0.0212           | 98.70%         |
| Omitting Tamburrino, M. B.2009 <sup>117</sup> | 29.57          | 26.44           | 32.71           | 0.0215           | 98.70%         |
| Omitting Daaleman, T. P.2006 <sup>108</sup>   | 29.85          | 26.74           | 32.96           | 0.0211           | 98.60%         |
| Omitting Drayer, R. A.2006 <sup>109</sup>     | 29.56          | 26.45           | 32.67           | 0.0212           | 98.70%         |
| Omitting Mischoulon, D.2001 <sup>113</sup>    | 29.83          | 26.69           | 32.96           | 0.0215           | 98.70%         |
| Omitting Mancuso, C. A.2000 <sup>118</sup>    | 29.36          | 26.26           | 32.46           | 0.0210           | 98.70%         |
| Omitting Hankin, C. S.1999 <sup>110</sup>     | 29.52          | 26.40           | 32.63           | 0.0212           | 98.70%         |
| Omitting Steer, R. A.1999 <sup>90</sup>       | 29.60          | 26.48           | 32.71           | 0.0212           | 98.70%         |
| Omitting Hollifield, M.1994 <sup>111</sup>    | 29.61          | 26.50           | 32.73           | 0.0212           | 98.70%         |
| Omitting Popescu, M. L.2012 <sup>124</sup>    | 29.60          | 26.48           | 32.71           | 0.0212           | 98.70%         |
| Omitting Mathew, R. S.2011 <sup>123</sup>     | 29.37          | 26.27           | 32.48           | 0.0211           | 98.70%         |
| Omitting Evans, J. R.2007 <sup>121</sup>      | 29.75          | 26.57           | 32.93           | 0.0221           | 98.70%         |
| Omitting Rovner, B. W.2006 <sup>120</sup>     | 29.61          | 26.49           | 32.72           | 0.0212           | 98.70%         |
| Omitting Lee, A. G.2003 <sup>119</sup>        | 29.64          | 26.53           | 32.75           | 0.0212           | 98.70%         |
| Omitting Brody, B. L.2001 <sup>122</sup>      | 29.51          | 26.39           | 32.62           | 0.0211           | 98.70%         |

**Supplementary Table 1. Sensitivity analysis of the 83 Selected Studies**

| First Author, Year                       | Prevalence (%) | Lower<br>95% CI | Upper<br>95% CI | tau <sup>2</sup> | I <sup>2</sup> |
|------------------------------------------|----------------|-----------------|-----------------|------------------|----------------|
| Omitting Lee, T. J.2016 <sup>127</sup>   | 29.20          | 26.09           | 32.30           | 0.0211           | 98.70%         |
| Omitting Goto, F.2012 <sup>125</sup>     | 29.27          | 26.17           | 32.37           | 0.0210           | 98.70%         |
| Omitting Asghari, A.2012 <sup>126</sup>  | 29.37          | 26.29           | 32.46           | 0.0208           | 98.70%         |
| Omitting Chan, H.2012 <sup>130</sup>     | 29.68          | 26.56           | 32.79           | 0.0212           | 98.70%         |
| Omitting Wright, E.2008 <sup>131</sup>   | 29.45          | 26.35           | 32.56           | 0.0210           | 98.70%         |
| Omitting Kolaric, B.2006 <sup>103</sup>  | 29.64          | 26.53           | 32.76           | 0.0212           | 98.70%         |
| Omitting Judd, F.2005 <sup>132</sup>     | 29.48          | 26.37           | 32.59           | 0.0211           | 98.70%         |
| Omitting Olley, B. O.2003 <sup>128</sup> | 29.48          | 26.37           | 32.59           | 0.0211           | 98.70%         |
| Pooled estimate                          | 29.54          | 26.44           | 32.63           | 0.0211           | 98.70%         |
